# Supplementary material for: Comparative analysis of active ingredients and effects of the combination of Panax ginseng and Ophiopogon japonicus at different proportions on chemotherapy-induced myelosuppression mouse
Source: Royal Society of Chemistry journal article supplement (doi:10.1039/c8fo02354a), 2019-01-01
Supplement: c8fo02354a1.pdf [file c8fo02354a1.pdf]

# **Comparative analysis of active ingredients and effects of the combination of different proportions of *Panax ginseng* - *Ophiopogon japonicus* on chemotherapy-induced myelosuppression mouse**

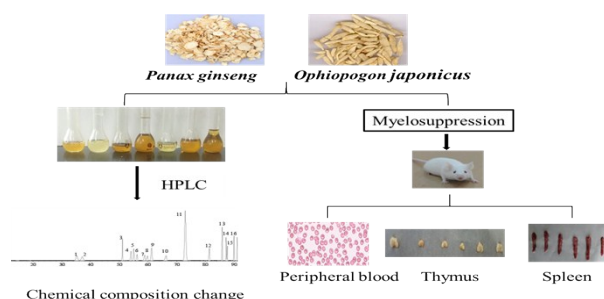

The *Panax ginseng* - *Ophiopogon japonicus* with the ratio of 2:3 exhibited the powerful therapeutic effect on myelosuppression mice.
